# Supplementary material for: The Draft Genome and Transcriptome of Amaranthus hypochondriacus: A C4 Dicot Producing High-Lysine Edible Pseudo-Cereal
Source: PubMed Central journal article supplement — DNA Res. 2014 Jul 28;21(6):585–602. doi: 10.1093/dnares/dsu021 (PMC4263292; doi:10.1093/dnares/dsu021), 2014-07-28

Supplementary Figure S1: A poster of plant taxonomy extended to include majority of the edible species.

Supplementary Figure S2: Comparison of AT percentage of *A. hypochondriacus* with those of *S. lycopersicum*, *V. vinifera* and *A. thaliana*.

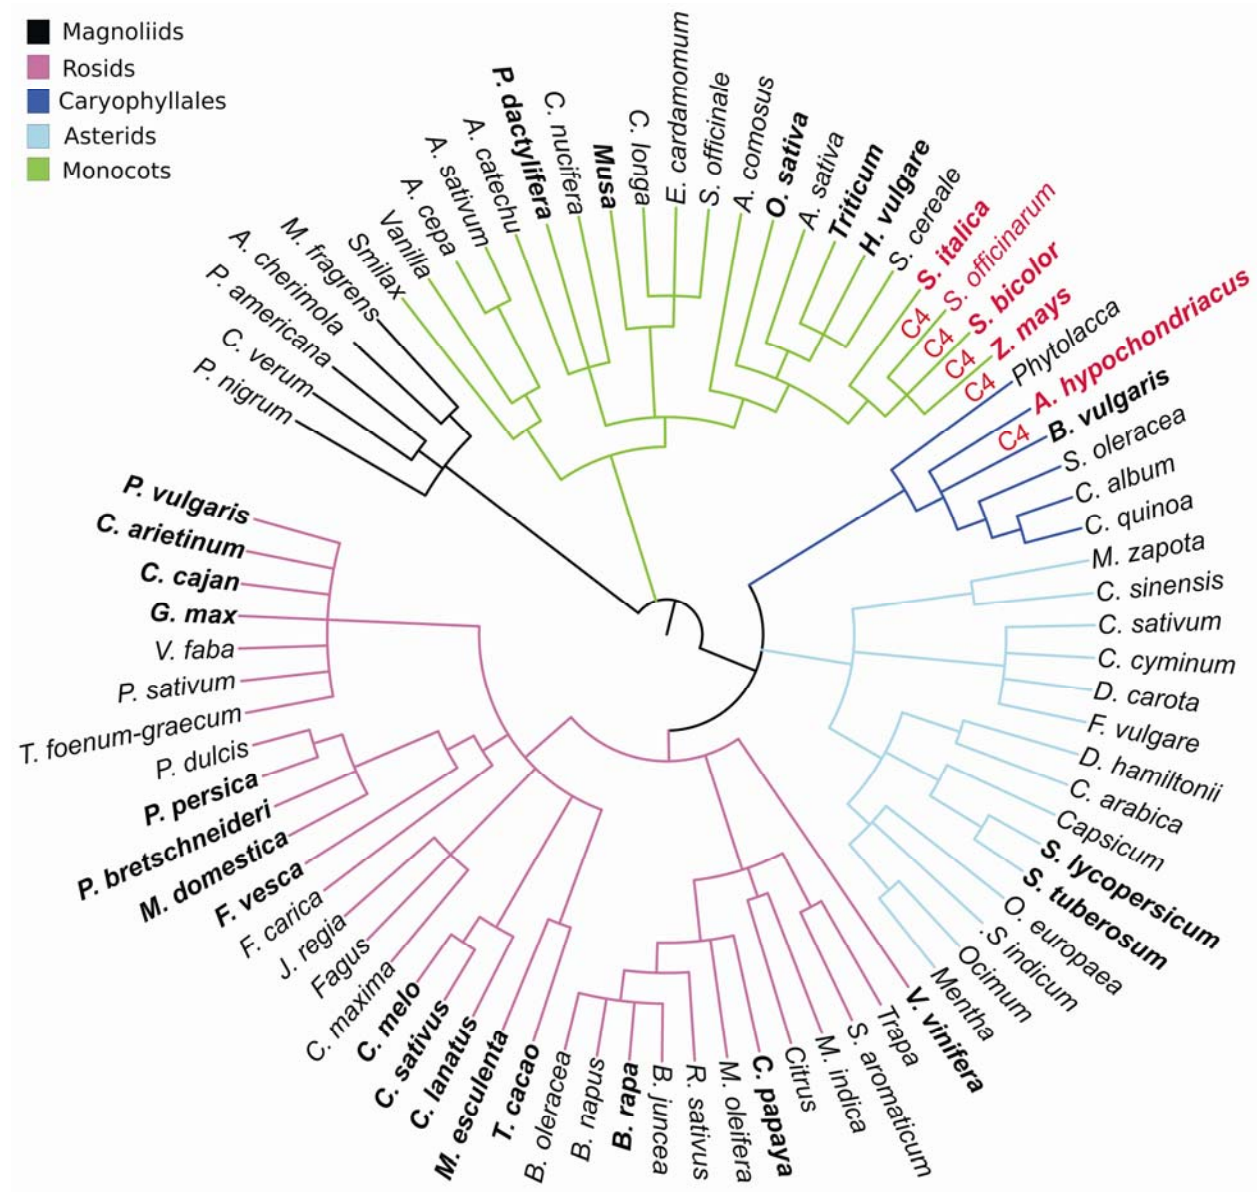

## Comparative base composition in sequenced genomes

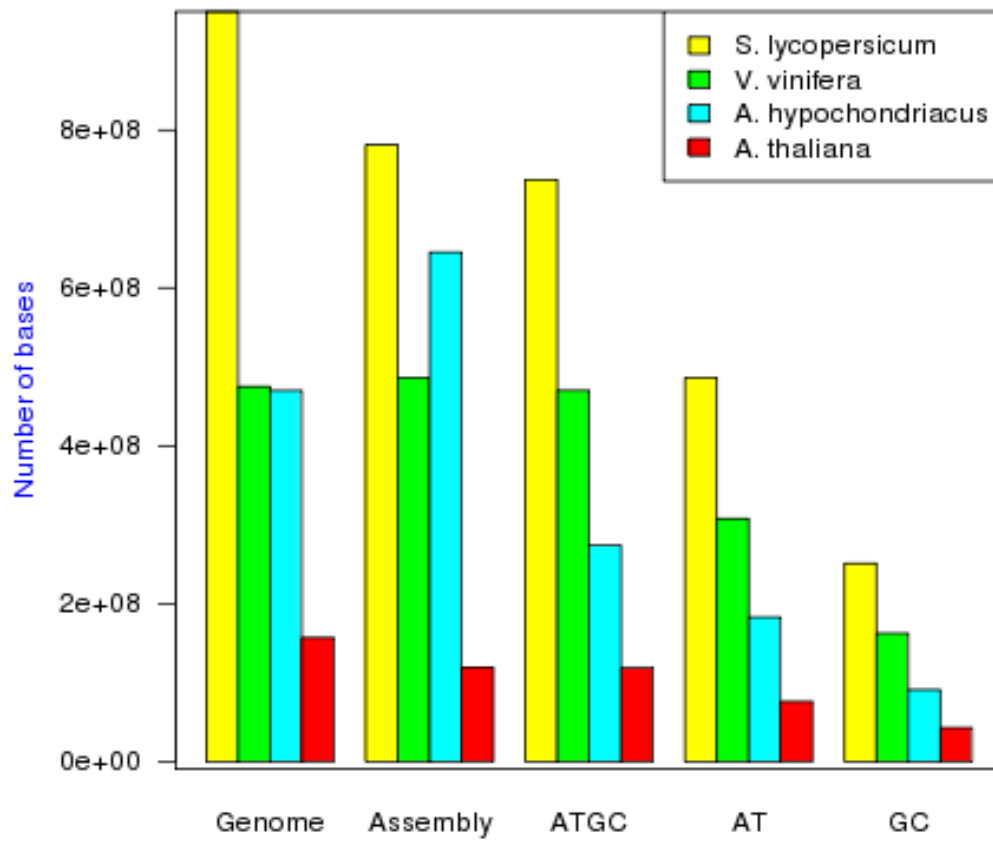

Supplement: supp_dsu021_dsu021supp.pdf [file supp_dsu021_dsu021supp.pdf]
